# Supplementary material for: Self-assembly of a cholesteryl-modified nucleoside into tubular structures from giant unilamellar vesicles
Source: Royal Society of Chemistry journal article supplement (doi:10.1039/c4ra11289j), 2014-12-05

## ESI

### Self-assembly of a cholesteryl-modified nucleoside into tubular structures from giant unilamellar vesicles

Luisa Losensky, Salvatore Chiantia, Gudrun Holland, Michael Laue, Anca Petran, Jürgen Liebscher, and Anna Arbuzova

Box plots of the tubules dimensions (96 tubules, 4 samples).

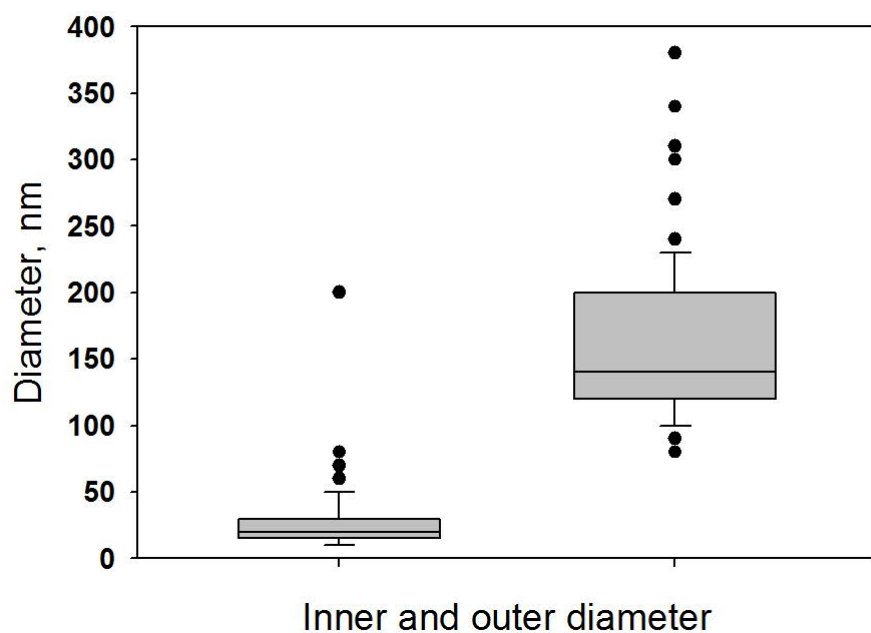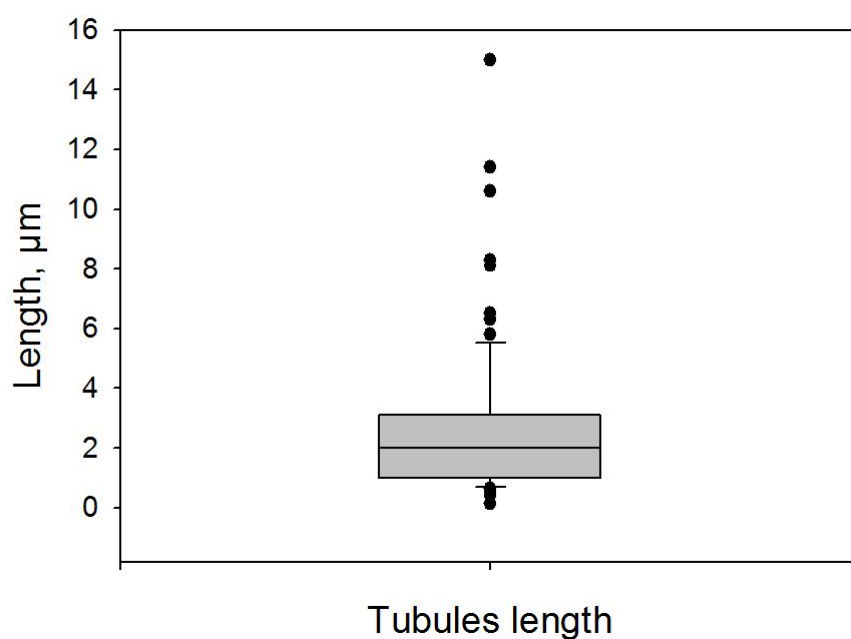

Supplement: c4ra11289j1.pdf [file c4ra11289j1.pdf]
